# Supplementary material for: Modified inflammation-based score as an independent malignant predictor in patients with pulmonary focal ground-glass opacity: a propensity score matching analysis
Source: PubMed Central journal article supplement (PMC4707538; doi:10.1038/srep19105), 2016-01-11
Supplement: srep19105-s1.pdf [file srep19105-s1.pdf]

## Title

Modified inflammation-based score as an independent malignant predictor in patients with pulmonary focal ground-glass opacity: a propensity score matching analysis

## Authors

Long Jiang<sup>\*1,2,3,4</sup>, Shanshan Jiang<sup>\*1</sup>, Yongbin Lin<sup>1,2,3</sup>, Han Yang<sup>1,2,3</sup>, Zerui Zhao<sup>1,2,3</sup>, Zehua Xie<sup>1,2,3</sup>, Yaobin Lin<sup>1,2,3</sup>, and Hao Long<sup>1,2,3</sup>

\*These authors contributed equally to this article.

## Supplemental Table S1

Table S1 Histopathological characteristic before and after PSM

| Characteristic            | Before PSM (n=128) |       | After PSM (n=82) |       | P     |
|---------------------------|--------------------|-------|------------------|-------|-------|
| Histopathological results |                    |       |                  |       | 0.152 |
| Adenocarcinoma            | 26                 | 20.3% | 12               | 14.6% |       |
| Squamous cell carcinoma   | 10                 | 7.8%  | 5                | 6.2%  |       |
| Carcinoma in situ         | 29                 | 22.7% | 17               | 20.7% |       |
| Lymphoepithelioma         | 12                 | 9.4%  | 7                | 8.5%  |       |
| Tuberculoma               | 14                 | 10.9% | 11               | 13.4% |       |
| Pneumonia                 | 31                 | 24.2% | 27               | 32.9% |       |
| Hamartoma                 | 6                  | 4.7%  | 3                | 3.7%  |       |

PSM: propensity score matching
